# Supplementary material for: Feasibility of Co-Targeting HER3 and EpCAM Using Seribantumab and DARPin–Toxin Fusion in a Pancreatic Cancer Xenograft Model
Source: MDPI journal article supplement (doi:10.3390/ijms24032838), 2023-02-02
Supplement: s1 [file s1]

## Supplementary Information

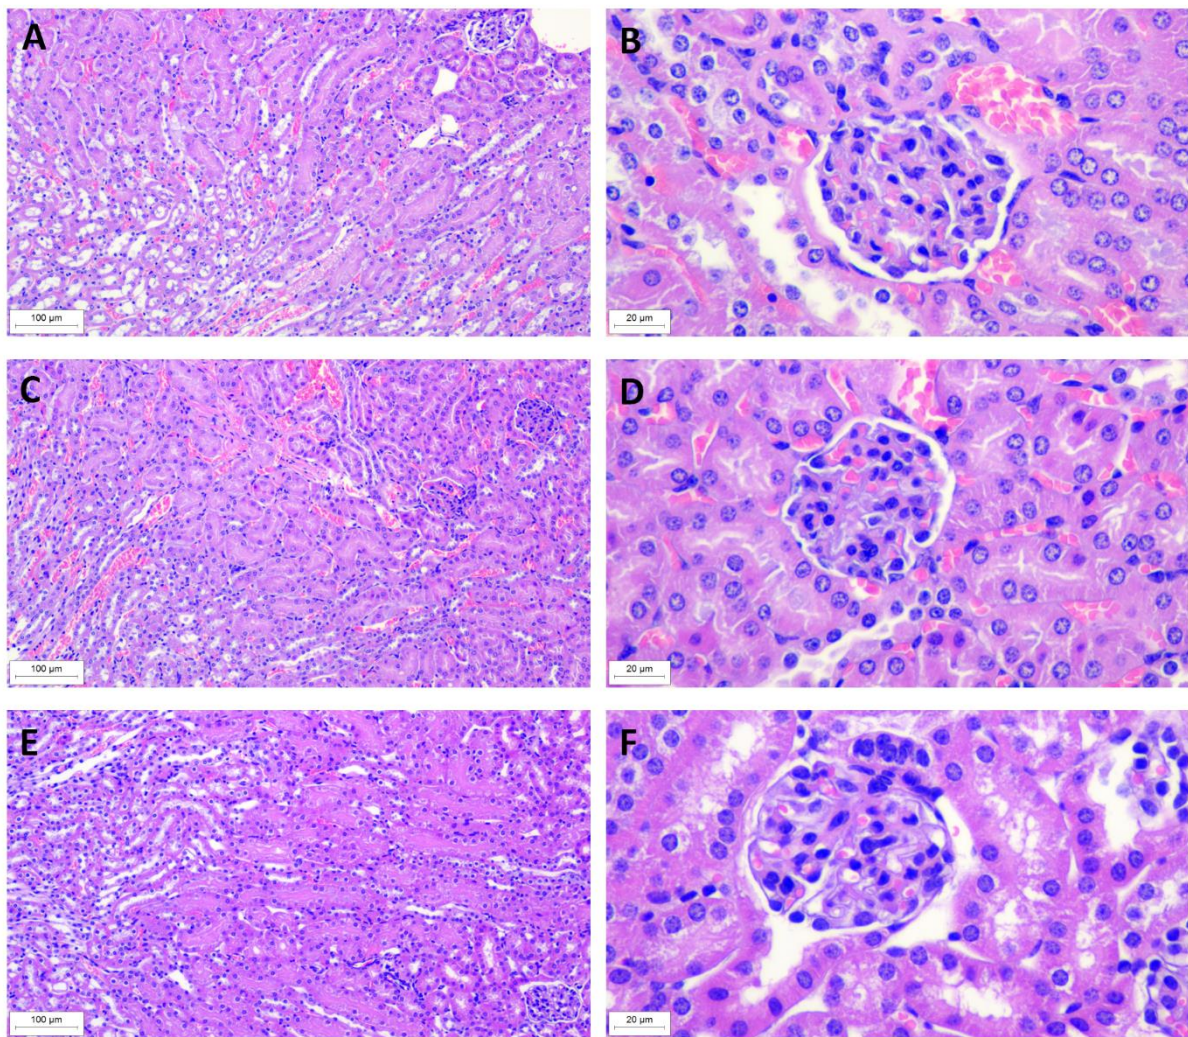

**Figure S1.** Representative images of pathological examination of kidneys. Hematoxylin and eosin stain, 100x and 400x of kidney in a mouse from (A, B) Ec1-LoPE and MM-121 combination group A, (C, D) Ec1-LoPE monotherapy group B and (E, F) vehicle control group D.



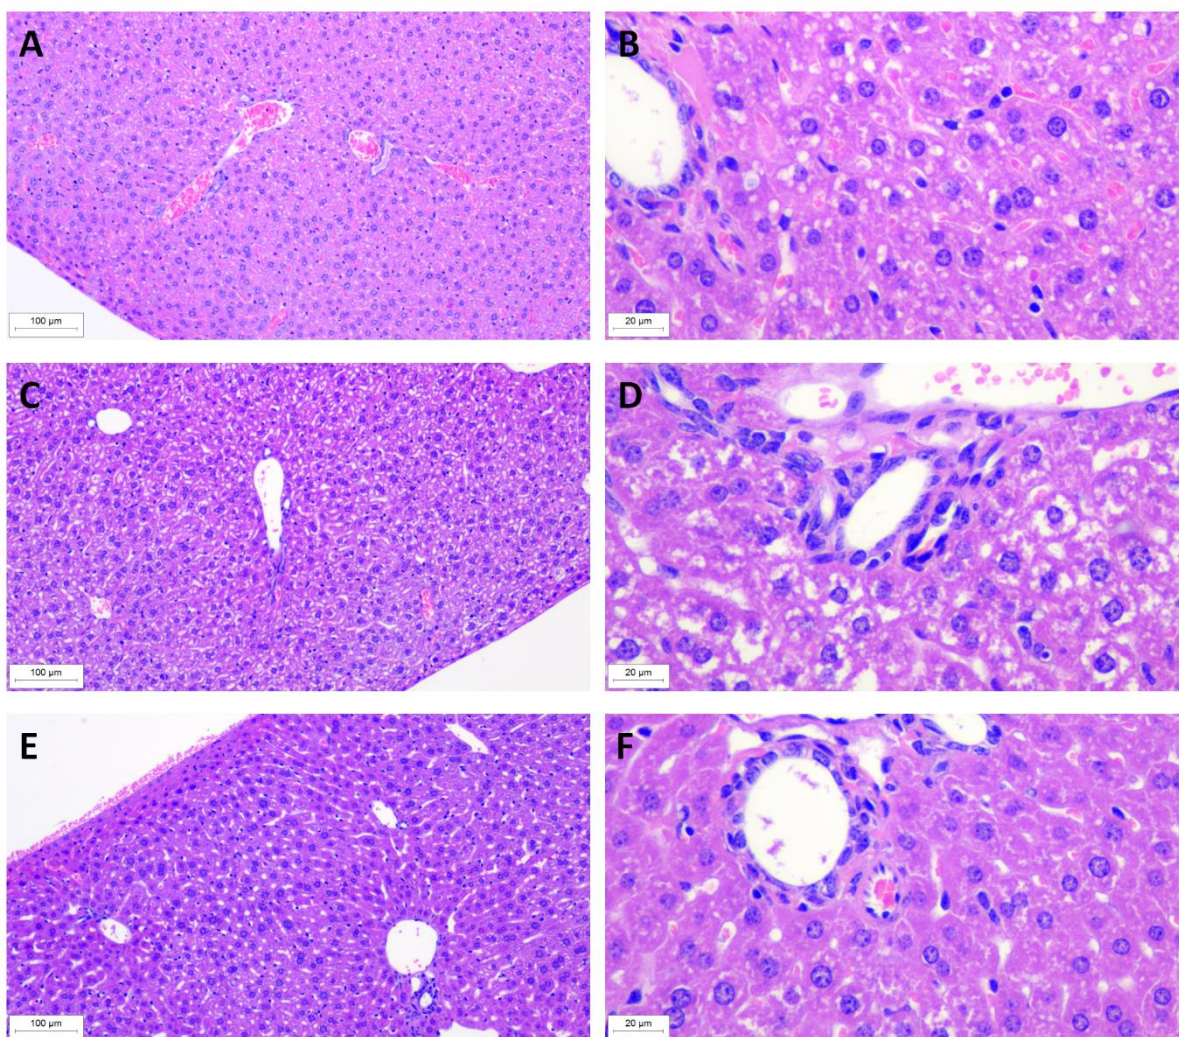

**Figure S2.** Representative images of pathological examination of liver. Hematoxylin and eosin stain, 100x and 400x of liver in a mouse from (A, B) Ec1-LoPE and MM-121 combination group A, (C, D) Ec1-LoPE monotherapy group B and (E, F) vehicle control group D.

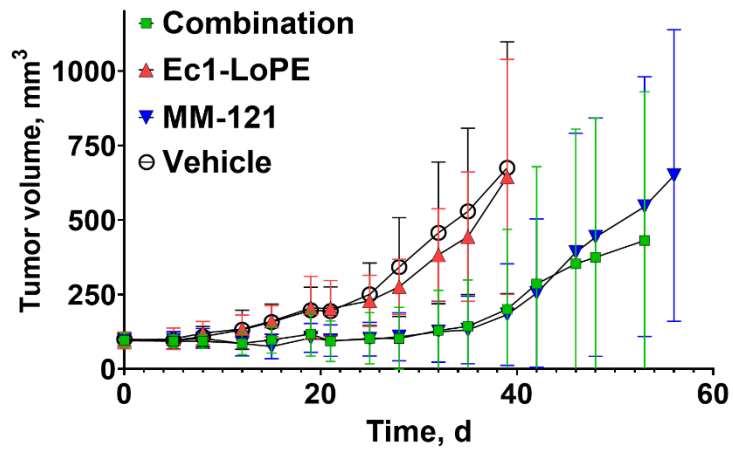

**Figure S3.** The average tumor volume growth curves in BALB/c nu/nu mice bearing BxPC3 xenografts from four groups ( $n = 9-10$ ) receiving combination of Ec1-LoPE and MM-121, Ec1-LoPE only, MM-121 only and vehicle (0.9% NaCl). The data are presented as average  $\pm$  standard deviation (SD). The curves were drawn until 30-33% of the mice in a group were euthanized.

| Day | 0   | 5   | 8   | 12  | 15  | 19  | 21  | 25   | 28  | 32  | 35  | 39   | 42   | 46   | 48   | 53   | 56   | 59   | 63   | 67  | 70  | 73  | 76  | 80  | 84   | 87  | 90  |
|-----|-----|-----|-----|-----|-----|-----|-----|------|-----|-----|-----|------|------|------|------|------|------|------|------|-----|-----|-----|-----|-----|------|-----|-----|
| A1  | 107 | 98  | 101 | 137 | 73  | 71  | 34  | 30   | 18  | 10  | 8   | 7    | 14   | 17   | 26   | 61   | 63   | 134  | 181  | 222 | 282 | 393 | 381 | 407 | 500  | 559 | 554 |
| A2  | 79  | 104 | 69  | 65  | 65  | 88  | 62  | 40   | 23  | 35  | 54  | 30   | 46   | 36   | 31   | 39   | 37   | 43   | 59   | 42  | 43  | 51  | 51  | 56  | 42   | 39  | 42  |
| A3  | 96  | 99  | 107 | 120 | 159 | 189 | 119 | 95   | 88  | 178 | 164 | 108  | 227  | 352  | 310  | 456  | 527  | 690  | 1040 |     |     |     |     |     |      |     |     |
| A4  | 99  | 97  | 107 | 138 | 163 | 250 | 210 | 259  | 318 | 414 | 486 | 840  | 1164 |      |      |      |      |      |      |     |     |     |     |     |      |     |     |
| A5  | 87  | 61  | 70  | 55  | 41  | 57  | 38  | 40   | 18  | 14  | 29  | 30   | 40   | 51   | 51   | 58   | 78   | 129  | 191  | 279 | 349 | 441 | 508 | 696 | 747  |     |     |
| A6  | 83  | 86  | 95  | 82  | 115 | 68  | 53  | 69   | 34  | 26  | 30  | 76   | 99   | 117  | 96   | 104  | 100  | 96   | 133  | 183 | 335 | 511 | 657 | 764 | 1122 |     |     |
| A7  | 77  | 85  | 82  | 73  | 79  | 121 | 111 | 126  | 150 | 189 | 189 | 262  | 339  | 597  | 811  | 1122 |      |      |      |     |     |     |     |     |      |     |     |
| A8  | 83  | 81  | 71  | 41  | 108 | 74  | 76  | 105  | 146 | 206 | 157 | 143  | 66   | 62   | 124  | 170  | 169  | 234  | 248  | 360 | 472 |     |     |     |      |     |     |
| A9  | 91  | 85  | 85  | 45  | 44  | 39  | 21  | 17   | 11  | 6   | 6   | 23   | 48   | 25   | 27   | 27   | 37   | 32   | 50   | 32  | 37  | 36  | 0   | 0   | 23   | 17  | 23  |
| A10 | 158 | 139 | 143 | 117 | 129 | 214 | 206 | 244  | 218 | 214 | 305 | 484  | 814  | 1107 |      |      |      |      |      |     |     |     |     |     |      |     |     |
| B1  | 122 | 125 | 153 | 183 | 266 | 475 | 422 | 301  | 352 | 387 | 415 | 572  | 983  |      |      |      |      |      |      |     |     |     |     |     |      |     |     |
| B2  | 136 | 142 | 187 | 196 | 237 | 286 | 261 | 366  | 420 | 513 | 626 | 1142 |      |      |      |      |      |      |      |     |     |     |     |     |      |     |     |
| B3  | 59  | 52  | 76  | 92  | 111 | 169 | 121 | 199  | 222 | 350 | 279 | 353  | 667  | 1026 |      |      |      |      |      |     |     |     |     |     |      |     |     |
| B4  | 76  | 74  | 89  | 100 | 136 | 128 | 154 | 158  | 227 | 344 | 418 | 606  | 892  | 1186 |      |      |      |      |      |     |     |     |     |     |      |     |     |
| B5  | 119 | 101 | 128 | 182 | 161 | 193 | 240 | 316  | 396 | 724 | 833 | 1181 |      |      |      |      |      |      |      |     |     |     |     |     |      |     |     |
| B6  | 95  | 83  | 124 | 135 | 115 | 204 | 232 | 190  | 197 | 228 | 239 | 326  | 369  | 884  | 1181 |      |      |      |      |     |     |     |     |     |      |     |     |
| B7  | 123 | 143 | 126 | 142 | 167 | 138 | 105 | 118  | 171 | 303 | 215 | 200  | 319  | 528  | 626  | 824  | 1133 |      |      |     |     |     |     |     |      |     |     |
| B8  | 57  | 56  | 65  | 68  | 157 | 173 | 191 | 261  | 258 | 333 | 580 | 577  | 711  | 1004 |      |      |      |      |      |     |     |     |     |     |      |     |     |
| B9  | 81  | 93  | 90  | 83  | 112 | 138 | 124 | 114  | 175 | 182 | 197 | 267  | 352  | 404  | 569  | 776  | 1000 |      |      |     |     |     |     |     |      |     |     |
| B10 | 93  | 146 | 159 | 164 | 138 | 141 | 181 | 259  | 334 | 464 | 635 | 1217 |      |      |      |      |      |      |      |     |     |     |     |     |      |     |     |
| C1  | 42  | 61  | 86  | 62  | 66  | 69  | 68  | 104  | 143 | 124 | 149 | 143  | 280  | 445  | 546  | 716  | 876  | 1097 |      |     |     |     |     |     |      |     |     |
| C2  | 105 | 72  | 76  | 69  | 62  | 76  | 68  | 78</ |     |     |     |      |      |      |      |      |      |      |      |     |     |     |     |     |      |     |     |
